# Supplementary material for: The Infestation of Olive Fruits by Bactrocera oleae (Rossi) Modifies the Expression of Key Genes in the Biosynthesis of Volatile and Phenolic Compounds and Alters the Composition of Virgin Olive Oil
Source: MDPI journal article supplement (doi:10.3390/molecules27051650), 2022-03-02
Supplement: s1 [file s1]

## Supplementary Information

# The Infestation of Olive Fruits by *Bactrocera oleae* (Rossi) Modifies the Expression of Key Genes in the Biosynthesis of Volatile and Phenolic Compounds and Alters the Composition of Virgin Olive Oil

Andrés Notario, Rosario Sánchez, Pilar Luaces, Carlos Sanz and Ana G. Pérez \*

**Table S1:** Groups of volatile compound (according to their biochemical origin) analyzed in the oils.

|                           | Manzanilla |          | Picual   |          | Hojiblanca |          |
|---------------------------|------------|----------|----------|----------|------------|----------|
| Compounds (ng/g oil)      | Control    | Infested | Control  | Infested | Control    | Infested |
| $\Sigma$ aldehydes C6/LnA | 10255,8a   | 11960,4b | 15339,5a | 22678,6b | 16990,2a   | 22996,7b |
| $\Sigma$ alcohols C6/LnA  | 1075,1a    | 1167,5a  | 2420,6a  | 4879,7b  | 1507,1a    | 5423,4b  |
| $\Sigma$ C6/LnA           | 11423,3a   | 13035,5b | 17760,1a | 27558,4b | 18497,4a   | 28420,1b |
| $\Sigma$ aldehydes C6/LA  | 1515,8a    | 1547,1a  | 1734,9a  | 2506,2b  | 3495,9a    | 3440,0a  |
| $\Sigma$ alcohols C6/LA   | 271,4a     | 282,5a   | 463,0a   | 698,8b   | 341,2a     | 1129,2b  |
| $\Sigma$ C6/LA            | 1787,3a    | 1829,6a  | 2197,9a  | 3205,0b  | 3837,1a    | 4569,2b  |
| $\Sigma$ carbonyls C5/LnA | 614,6b     | 418,2a   | 878,9b   | 320,1a   | 687,0b     | 409,2a   |
| $\Sigma$ alcohols C5/LnA  | 2104,5a    | 2676,5b  | 868,7a   | 1036,2b  | 796,7b     | 747,0a   |
| $\Sigma$ DP               | 5835,1a    | 5544,7a  | 6146,9a  | 5846,7a  | 9846,9a    | 9461,8a  |
| $\Sigma$ C5/LnA           | 8544,3a    | 8639,5a  | 7894,6a  | 7203,0a  | 11330,8a   | 10618,1a |
| $\Sigma$ carbonyls C5/LA  | 397,4a     | 527,3b   | 236,8a   | 529,2b   | 278,2a     | 658,6b   |
| $\Sigma$ alcohols C5/LA   | 66,7a      | 49,0a    | 103,1a   | 129,8a   | 85,0a      | 132,4b   |
| $\Sigma$ C5/LA            | 464,1a     | 576,4b   | 339,9a   | 659,1b   | 363,3a     | 791,0b   |
| $\Sigma$ esters LOX       | 324,0a     | 547,9b   | 215,1a   | 419,9b   | 369,7a     | 410,9b   |
| $\Sigma$ esters no LOX    | 1130,0b    | 600,9a   | 1028,6a  | 1490,7b  | 1108,2b    | 1002,7a  |
| $\Sigma$ esters           | 1454,1b    | 1148,8a  | 1243,7a  | 1910,7b  | 1477,9a    | 1413,6a  |
| $\Sigma$ aldehydes AA     | 53,2a      | 108,5b   | 14,0a    | 22,65b   | 45,6a      | 46,8a    |
| $\Sigma$ alcohols AA      | 3,5a       | 4,3a     | 9,1a     | 16,2b    | 3,8b       | 2,6a     |
| $\Sigma$ volatiles AA     | 56,8a      | 112,8b   | 23,1a    | 38,8b    | 49,4a      | 49,4a    |

|                   |          |          |         |         |        |        |
|-------------------|----------|----------|---------|---------|--------|--------|
| <b>Σ terpenes</b> | 11753,4b | 10864,3a | 9096,9a | 9054,9a | 751,7a | 931,2b |
|-------------------|----------|----------|---------|---------|--------|--------|

(\*) mean contents from three different analyses

(\*\*) different letters within the same olive cultivar indicate statistically significant differences ( $p \leq 0.05$ )

Table S2

| Compounds (ng/g oil) | Picual C |   |       | Picual I |   |       | Manzanilla C |   |       | Manzanilla I |   |       | Hojiblanca C |   |       | Hojiblanca I |   |       |
|----------------------|----------|---|-------|----------|---|-------|--------------|---|-------|--------------|---|-------|--------------|---|-------|--------------|---|-------|
| Ethyl acetate        | 251.3    | ± | 6.3   | 568.1    | ± | 14.9  | 448.4        | ± | 10.1  | 721.1        | ± | 56.4  | 502.6        | ± | 14.0  | 728.9        | ± | 0.3   |
| Ethanol              | 504.4    | ± | 3.3   | 912.6    | ± | 32.2  | 231.4        | ± | 20.9  | 341.9        | ± | 9.8   | 767.0        | ± | 54.9  | 1280.5       | ± | 20.4  |
| E3-hexenal           | 844.6    | ± | 371.5 | 1729.6   | ± | 57.5  | 613.4        | ± | 40.6  | 283.6        | ± | 15.4  | 627.3        | ± | 21.0  | 461.1        | ± | 0.1   |
| Z3-hexenal           | 9229.6   | ± | 202.8 | 5277.9   | ± | 94.9  | 6963.9       | ± | 66.0  | 3119.0       | ± | 238.8 | 8946.3       | ± | 538.6 | 3137.5       | ± | 42.7  |
| Z2-hexenal           | 776.0    | ± | 24.2  | 478.0    | ± | 30.6  | 676.1        | ± | 50.3  | 332.2        | ± | 13.5  | 945.3        | ± | 56.3  | 437.1        | ± | 4.3   |
| E2-hexenal           | 4489.3   | ± | 95.7  | 15193.1  | ± | 247.5 | 3707.0       | ± | 317.1 | 6521.0       | ± | 214.0 | 6471.3       | ± | 223.6 | 18961.0      | ± | 190.9 |
| E3-hexenol           | 20.6     | ± | 3.5   | 103.9    | ± | 1.3   | 10.4         | ± | 0.4   | 24.4         | ± | 1.0   | 26.0         | ± | 0.4   | 31.9         | ± | 1.2   |
| Z3-hexenol           | 2153.9   | ± | 2.4   | 3684.6   | ± | 58.0  | 854.2        | ± | 44.4  | 875.0        | ± | 7.7   | 1234.3       | ± | 19.7  | 3782.3       | ± | 50.5  |
| E2-hexenol           | 246.1    | ± | 16.3  | 1091.3   | ± | 42.9  | 210.6        | ± | 40.2  | 268.2        | ± | 0.8   | 246.8        | ± | 4.2   | 1609.2       | ± | 22.5  |
| hexanal              | 1734.9   | ± | 60.3  | 2506.2   | ± | 20.6  | 1515.9       | ± | 27.2  | 1547.1       | ± | 58.4  | 3495.9       | ± | 29.8  | 3440.1       | ± | 46.3  |
| hexanol              | 463.0    | ± | 10.4  | 698.8    | ± | 9.4   | 271.5        | ± | 36.4  | 282.5        | ± | 12.2  | 341.3        | ± | 5.3   | 1129.2       | ± | 11.1  |
| 1-penten-3-one       | 682.6    | ± | 16.3  | 198.7    | ± | 5.9   | 478.5        | ± | 18.1  | 311.6        | ± | 0.9   | 506.8        | ± | 25.6  | 243.1        | ± | 8.6   |
| Z2-pentenal          | 80.8     | ± | 3.5   | 23.3     | ± | 0.7   | 62.7         | ± | 3.7   | 41.1         | ± | 0.0   | 69.1         | ± | 3.8   | 21.0         | ± | 0.5   |
| E2-pentenal          | 115.6    | ± | 6.4   | 98.1     | ± | 5.9   | 73.5         | ± | 8.0   | 65.5         | ± | 3.9   | 111.2        | ± | 2.3   | 145.1        | ± | 5.0   |
| 1-penten-3-ol        | 181.8    | ± | 13.7  | 126.1    | ± | 6.5   | 135.0        | ± | 9.8   | 120.6        | ± | 5.2   | 158.1        | ± | 6.5   | 137.1        | ± | 7.5   |
| Z2-pentenol          | 485.2    | ± | 3.3   | 576.4    | ± | 10.6  | 392.5        | ± | 10.0  | 595.4        | ± | 17.1  | 336.4        | ± | 7.6   | 320.1        | ± | 6.2   |
| E2-pentenol          | 201.7    | ± | 2.3   | 333.8    | ± | 8.0   | 1577.0       | ± | 43.9  | 1960.6       | ± | 37.5  | 302.3        | ± | 4.2   | 289.9        | ± | 6.8   |
| DP-1                 | 278.6    | ± | 8.3   | 252.3    | ± | 6.1   | 240.5        | ± | 12.7  | 248.3        | ± | 12.5  | 501.9        | ± | 34.8  | 466.2        | ± | 16.1  |
| DP-2                 | 221.0    | ± | 4.8   | 210.2    | ± | 4.9   | 200.6        | ± | 8.3   | 213.9        | ± | 9.6   | 387.0        | ± | 39.9  | 364.8        | ± | 6.9   |
| DP-3                 | 1092.5   | ± | 17.8  | 1105.8   | ± | 0.3   | 1049.3       | ± | 25.4  | 1136.7       | ± | 56.3  | 2069.2       | ± | 44.6  | 2070.9       | ± | 41.7  |
| DP-4                 | 1985.3   | ± | 40.1  | 1489.6   | ± | 33.9  | 1687.7       | ± | 111.2 | 1501.6       | ± | 141.1 | 2525.3       | ± | 135.3 | 2249.6       | ± | 41.7  |
| DP-5                 | 317.0    | ± | 22.0  | 339.5    | ± | 3.0   | 365.1        | ± | 9.0   | 403.0        | ± | 14.1  | 510.2        | ± | 17.1  | 568.9        | ± | 19.2  |
| DP-6                 | 1290.8   | ± | 40.5  | 1265.5   | ± | 64.6  | 1114.2       | ± | 107.6 | 1525.4       | ± | 517.1 | 1740.3       | ± | 245.6 | 2154.3       | ± | 82.6  |
| DP-7                 | 961.7    | ± | 371.0 | 1183.9   | ± | 91.0  | 1177.7       | ± | 320.0 | 515.9        | ± | 515.9 | 2113.1       | ± | 350.6 | 1587.1       | ± | 506.9 |
| 2+3-pentanone        | 170.1    | ± | 19.5  | 476.7    | ± | 39.7  | 324.8        | ± | 24.6  | 444.5        | ± | 30.2  | 245.8        | ± | 30.6  | 634.4        | ± | 50.5  |
| pentanal             | 66.7     | ± | 3.6   | 52.5     | ± | 2.7   | 72.6         | ± | 5.0   | 82.8         | ± | 0.8   | 32.5         | ± | 10.6  | 24.2         | ± | 0.5   |
| pentanol             | 103.1    | ± | 24.7  | 129.9    | ± | 23.9  | 66.7         | ± | 4.8   | 49.1         | ± | 37.6  | 85.1         | ± | 3.8   | 132.4        | ± | 0.9   |
| Hexy acetate         | 94.9     | ± | 18.7  | 221.5    | ± | 1.2   | 158.9        | ± | 19.9  | 325.5        | ± | 3.9   | 203.3        | ± | 5.3   | 233.9        | ± | 2.9   |
| E2-hexenyl acetate   | 106.6    | ± | 17.0  | 170.8    | ± | 26.3  | 90.5         | ± | 18.0  | 158.0        | ± | 42.5  | 132.5        | ± | 1.0   | 161.6        | ± | 0.4   |
| Z3-hexenyl acetate   | 13.6     | ± | 2.0   | 27.7     | ± | 9.0   | 74.7         | ± | 25.4  | 64.4         | ± | 5.2   | 33.9         | ± | 6.2   | 15.4         | ± | 2.7   |
| Methyl acetate       | 41.3     | ± | 3.5   | 59.6     | ± | 4.9   | 2.6          | ± | 0.2   | 17.3         | ± | 0.3   | 7.6          | ± | 1.0   | 22.8         | ± | 1.1   |
| Methyl hexanoate     | 27.2     | ± | 1.2   | 29.4     | ± | 0.8   | 99.6         | ± | 3.1   | 98.1         | ± | 1.5   | 55.3         | ± | 1.8   | 39.3         | ± | 1.9   |
| Ethyl hexanoate      | 957.8    | ± | 72.6  | 1398.6   | ± | 96.6  | 1027.1       | ± | 5.6   | 483.7        | ± | 25.6  | 1045.0       | ± | 37.3  | 939.5        | ± | 296.0 |
| 2-Me-butanal         | 9.5      | ± | 0.9   | 11.6     | ± | 2.2   | 41.5         | ± | 5.9   | 83.0         | ± | 9.6   | 20.3         | ± | 6.4   | 24.2         | ± | 1.6   |
| 3-Me-butanal         | 4.5      | ± | 0.4   | 11.0     | ± | 0.5   | 11.8         | ± | 2.4   | 25.5         | ± | 3.7   | 25.4         | ± | 6.3   | 22.6         | ± | 0.8   |
| 2+3-Methyl-butanol   | 9.2      | ± | 0.8   | 16.2     | ± | 2.1   | 3.6          | ± | 0.4   | 4.3          | ± | 0.4   | 3.9          | ± | 0.2   | 2.6          | ± | 0.2   |
| limonene             | 13.2     | ± | 13.2  | 8.2      | ± | 0.4   | 19.0         | ± | 6.6   | 13.3         | ± | 2.0   | 104.9        | ± | 3.8   | 211.9        | ± | 1.9   |
| β-Ocymene            | 1921.9   | ± | 398.6 | 10369.9  | ± | 487.2 | 1272.5       | ± | 31.2  | 4881.9       | ± | 101.5 | 1594.6       | ± | 94.7  | 1709.7       | ± | 2.1   |

**Table S3.** Significant Pearson correlation coefficients ( $p \leq 0.05$ ) between the infestation status and the main volatile compounds found in VOO.

| Compound                  | <i>r</i> |
|---------------------------|----------|
| ethyl acetate             | 0.822    |
| ethanol                   | 0.483    |
| (Z)-hex-3-enal            | -0.910   |
| (Z)-hex-2-enal            | -0.897   |
| (E)-hex-2-enal            | 0.753    |
| (E)-hex-3-enol            | 0.554    |
| (Z)-hex-3-enol            | 0.553    |
| (E)-hex-2-enol            | 0.694    |
| hexan-1-ol                | 0.566    |
| pent-1-en-3-one           | -0.902   |
| (Z)-pent-2-enal           | -0.927   |
| pent-1-en-3-ol            | -0.688   |
| pentan-3-one              | 0.864    |
| (E)-hex-2-en-1-yl acetate | 0.764    |
| (Z)-hex-3-en-1-yl acetate | -0.096   |
| $\beta$ -ocimene          | 0.626    |

**Table S4:** Statistically significant correlation coefficients between VOO phenolic compounds and infestation by BO

| Compounds (ng/g oil) | Correlation Coefficient |
|----------------------|-------------------------|
| Hydroxytyrosol       | -0.802598               |
| Tyrosol              | -0.856506               |
| Vanillic acid        | -0.787263               |
| vanillin             | -0.728496               |
| Pinoresinol          | -0.744461               |
| Cinnamic acid        | -0.831550               |
| Acetoxipinoresinol   | -0.915263               |
| 3,4-DHPEA-EA         | -0.699919               |
| p-HPEA-EA            | -0.696055               |
| Ferulic acid         | -0.579958               |
| Luteolin             | -0.754357               |
| Apigenin             | -0.731996               |

**Table S5.** Phenolic composition of olive fruits

| Phenolic compounds (µg/g FW)    | Manzanilla |          | Picual   |          | Hojiblanca |          |
|---------------------------------|------------|----------|----------|----------|------------|----------|
|                                 | Control    | Infested | Control  | Infested | Control    | Infested |
| <b>Hydroxytyrosol glucoside</b> | 3119,9b    | 1870,8a  | 781,6a   | 1091,5b  | 3172,5b    | 2776,1a  |
| <b>Tyrosol glucoside</b>        | 301,4b     | 159,4a   | 67,7a    | 72,9a    | 226,7b     | 199,8a   |
| <b>Demethyl oleuropein</b>      | 0,0a       | 0,0a     | 0,0a     | 0,0a     | 191,6a     | 122,8a   |
| <b>Oleuropein</b>               | 6817,7a    | 13917,2b | 5607,3a  | 5305,6a  | 3280,9a    | 3223,0a  |
| <b>Comselogoside</b>            | 2010,7a    | 2253,9b  | 3867,9b  | 1556,5a  | 646,1a     | 893,9b   |
| <b>Ligstroside</b>              | 218,1a     | 834,0b   | 390,8b   | 312,4a   | 130,9a     | 136,9a   |
| <b>Verbascoside</b>             | 1437,5a    | 3432,7b  | 1230,5a  | 2554,4b  | 3298,9a    | 3193,6a  |
| <b>Rutin</b>                    | 216,0a     | 381,3b   | 593,7b   | 149,1a   | 427,7a     | 390,9a   |
| <b>luteolin-7-glucoside</b>     | 182,6a     | 264,8b   | 60,6a    | 155,9b   | 587,2a     | 547,4a   |
| <b>total</b>                    | 14304,1a   | 23114,3b | 12600,4b | 11198,5a | 11962,8a   | 11484,8a |

(\*) mean contents and standard deviations from three different analyses

(\*\*) different letters within the same olive cultivar indicate statistically significant differences ( $p \leq 0.05$ )

**Table S6.** Real Time-Quantitative PCR primers used in this work.

| Primer             | Sequence (5' → 3')          |
|--------------------|-----------------------------|
| qOeGLU1A-F         | GAAGAACGTCGTAAAAGGCT        |
| qOeGLU1A-R         | CAACAATGACATGACTTTTCAACC    |
| qOeGLU1B-F         | GAAGAACGTCGTAAAAGGCT        |
| qOeGLU1B-R         | GTTGAAACCTCACTGGCCAGGTCTTT  |
| qOePPO1-F          | AGTGTA CTGCTGCCGGAAGTTTG    |
| qOePPO1-R          | TGTTGATTGGAACCAACCACCT      |
| qOePPO2-F          | CGCCTGCTGTTCTTGTCTTCTCA     |
| qOePPO2-R          | GTGCAAAGTGCAACCATCGATTA     |
| qOe1LOX2-F         | GAGAATTGGGTGCGTTCATAC       |
| qOe1LOX2-R         | TCCTCTGGTGTGGCTAATGTC       |
| qOe2LOX2-F         | GATCCAAACGACACCGAAAAGGAGGAA |
| qOe2LOX2-R         | GGCATTATATACTTATCATCTTTCCAG |
| qOeEF1 $\alpha$ -F | TGCTCTATCTGGATTGCCATT       |
| qOeEF1 $\alpha$ -R | TCAAATGCCACCATGACTTC        |
| qOeGAPDH-F         | TGAGATGCTGCACAATGGTT        |
| qOeGAPDH-R         | CACGATAGGCTTACGCAACA        |
